# Supplementary material for: Investigating the demographic history of Japan using ancient oral microbiota
Source: PubMed Central journal article supplement (PMC7702792; doi:10.1098/rstb.2019.0578), 2020-10-05

Figure S1. Taxonomic profile for 18019\_Japan\_Jomon\_5. Taxa coloured red are putative contaminants.

Figure S2. MapDamage cytosine deamination plots of reads mapping to the Anaerolineaceae sp oral taxon 439 genome. The left and right panels for each sample display the 5' C-to-T (red lines) and 3' G-to-A (blue lines) substitution rates, respectively.

Figure S3. MapDamage cytosine deamination plots of reads mapping to the Anaerolineaceae sp oral taxon 439 genome. The left and right panels for each sample display the 5' C-to-T (red lines) and 3' G-to-A (blue lines) substitution rates, respectively.

Figure S4. Edit distances of reads from samples aligned to the Anaerolineaceae sp oral taxon 439 genome.

Figure S5. Edit distances of reads from samples aligned to the Anaerolineaceae sp oral taxon 439 genome.

Figure S6. Edit distances of reads from samples aligned to the Anaerolineaceae sp oral taxon 439 genome.

Figure S7. Edit distances of reads from samples aligned to the Anaerolineaceae sp oral taxon 439 genome.

Figure S8. SourceTracker analysis of ancient dental calculus samples.

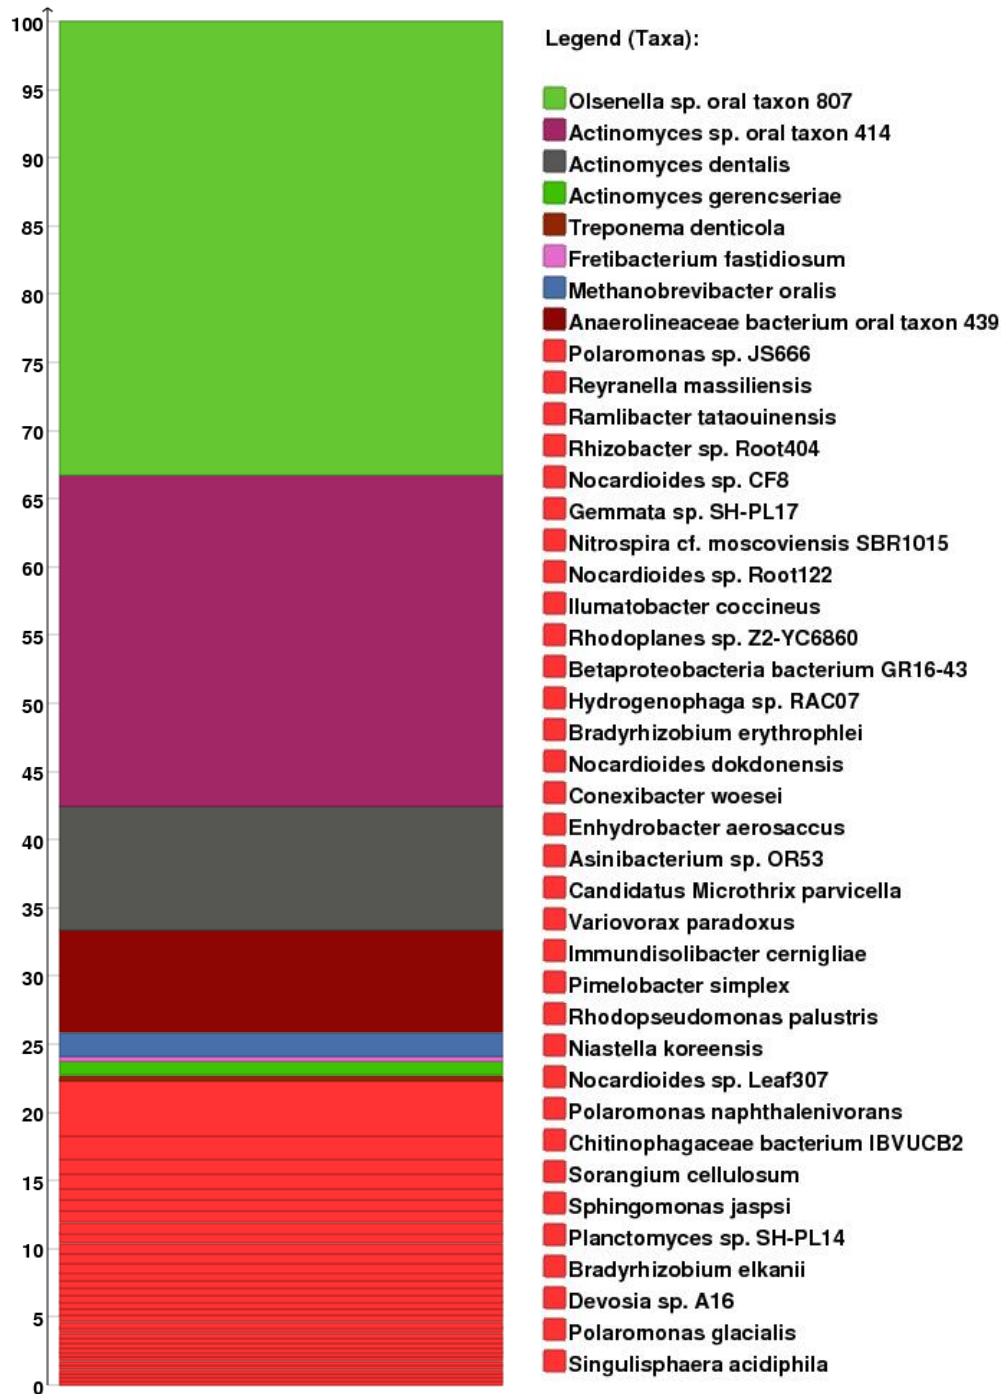

**Figure S1: Taxonomic profile for 18019\_Japan\_Jomon\_5. Taxa coloured red are putative contaminants.**

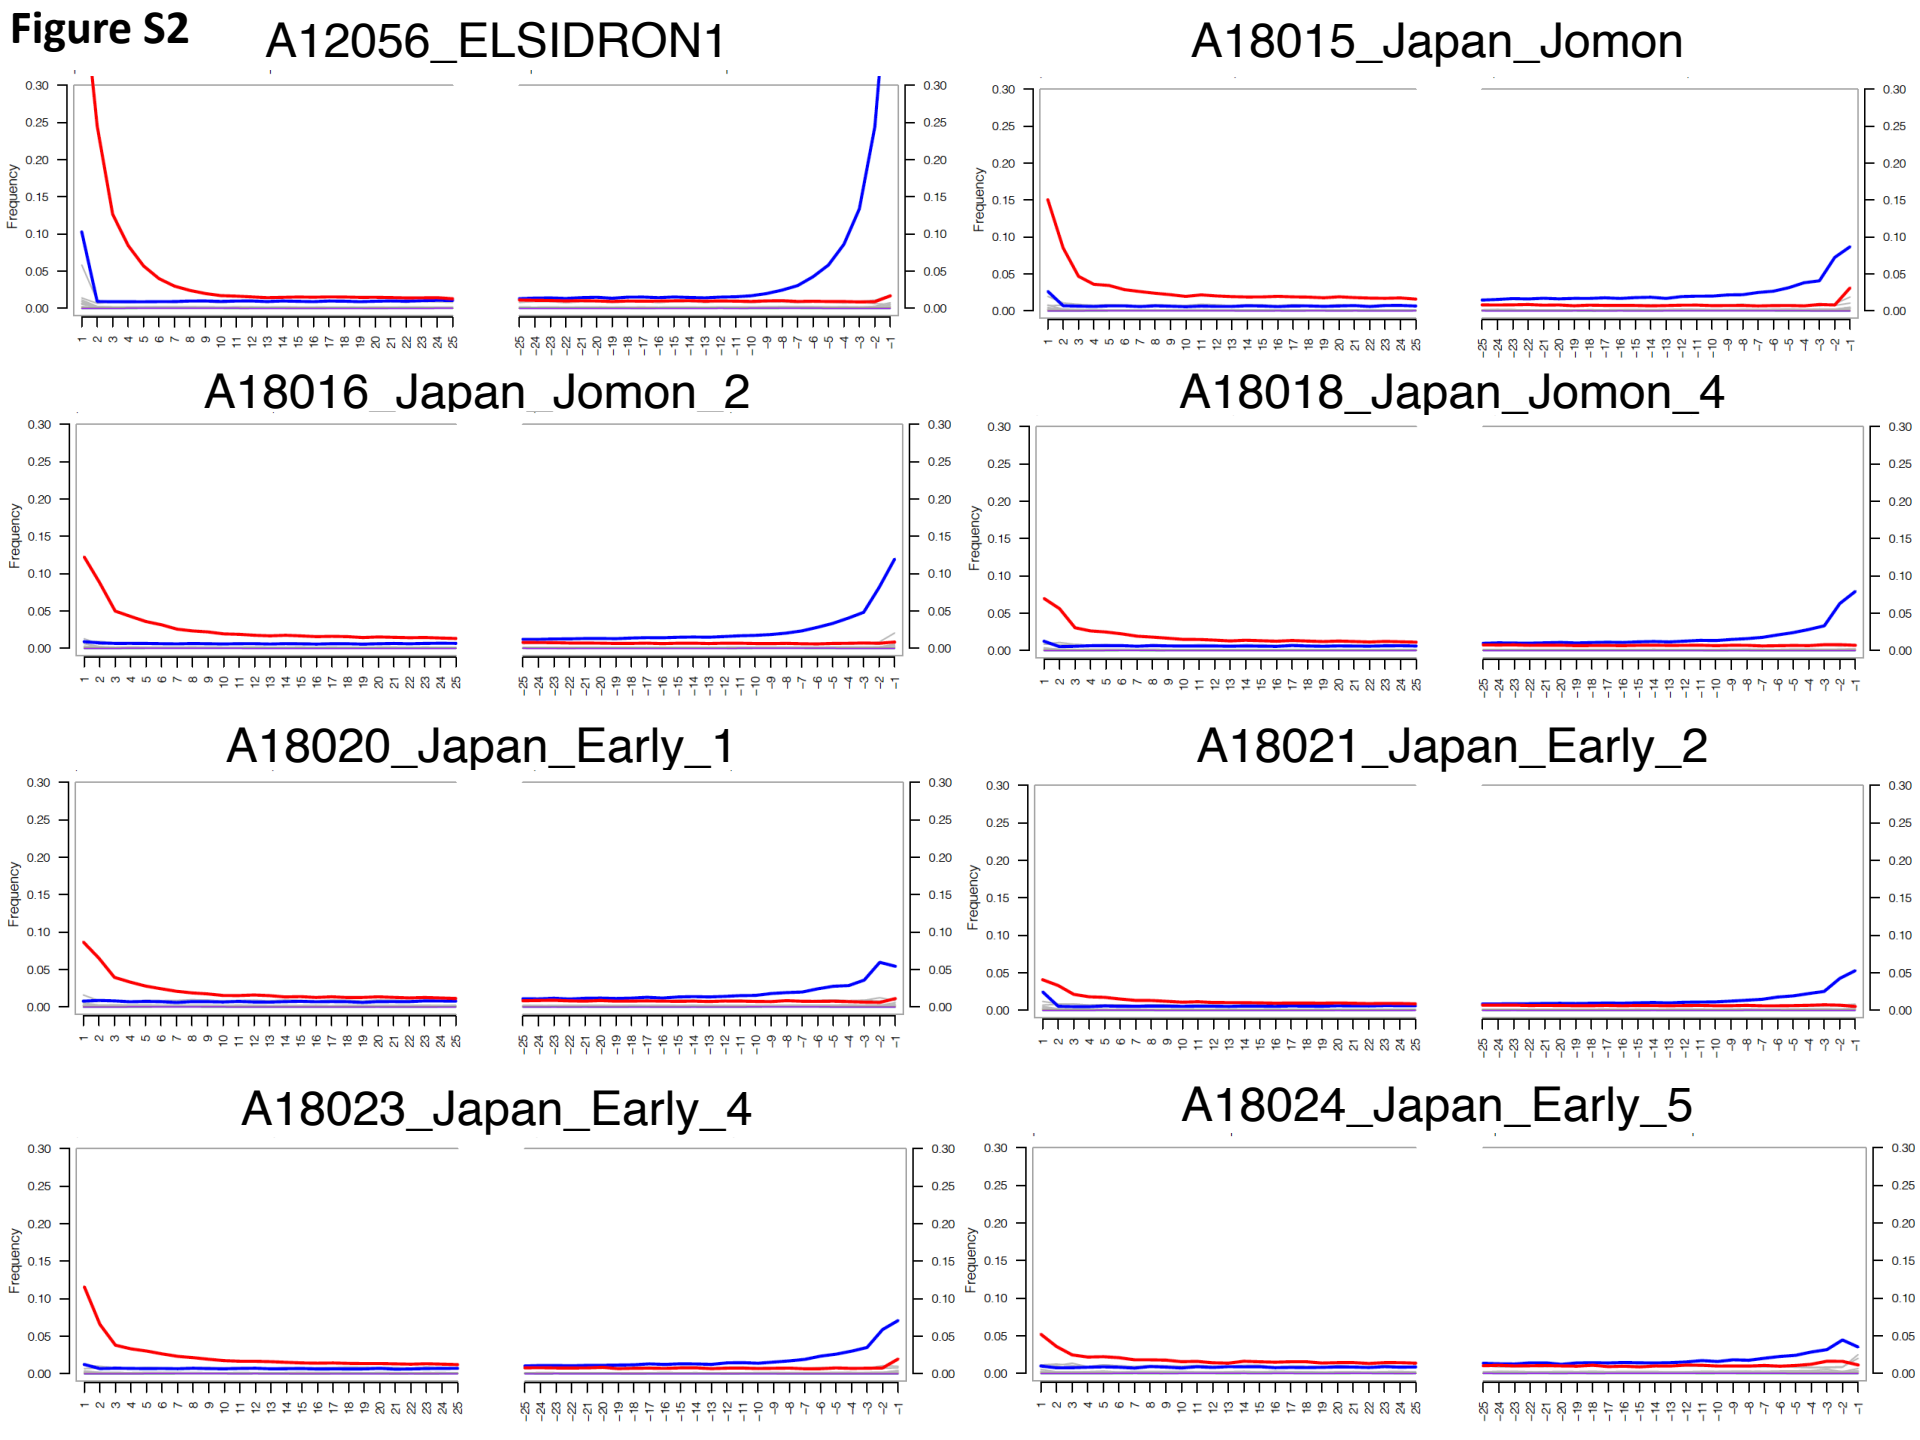

**Figure S3** A18025 Japan\_Early\_6

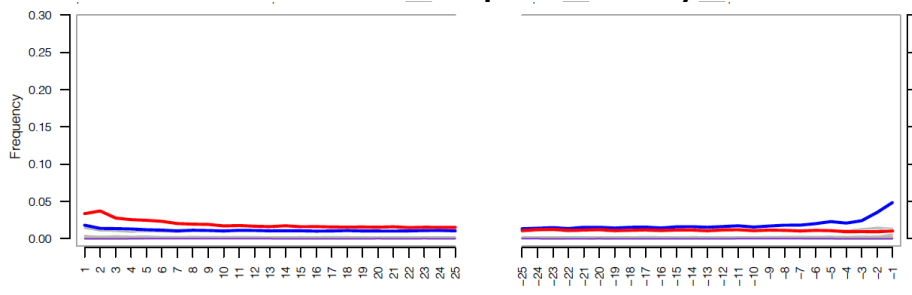

A18026 Japan\_Early\_7

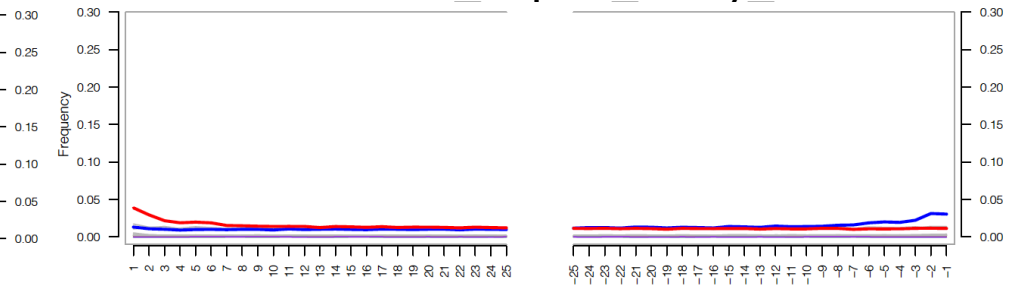

A18027\_Japan\_Early\_8

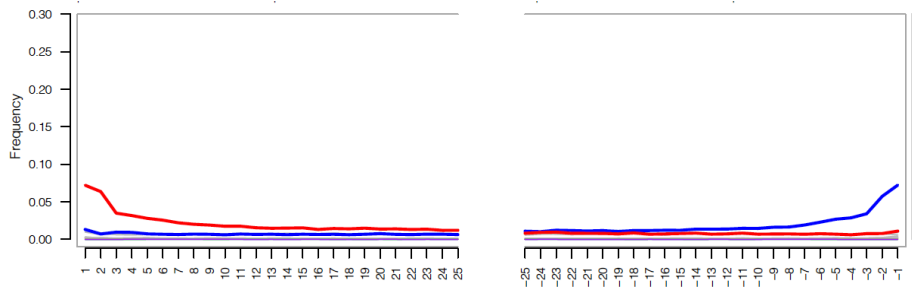

A18032\_Japan\_Early\_9

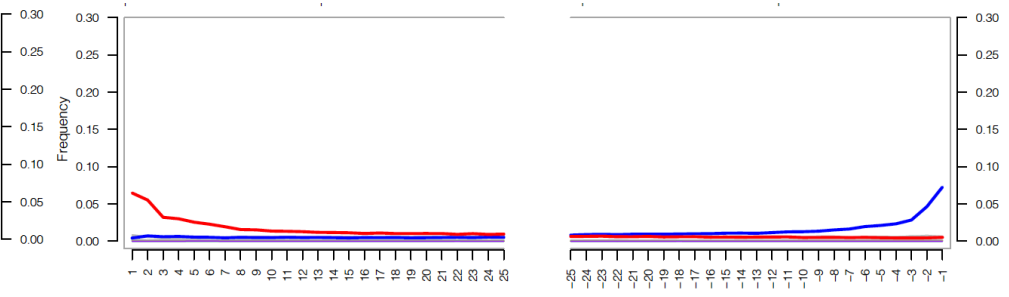

A18033\_Japan\_Early\_10

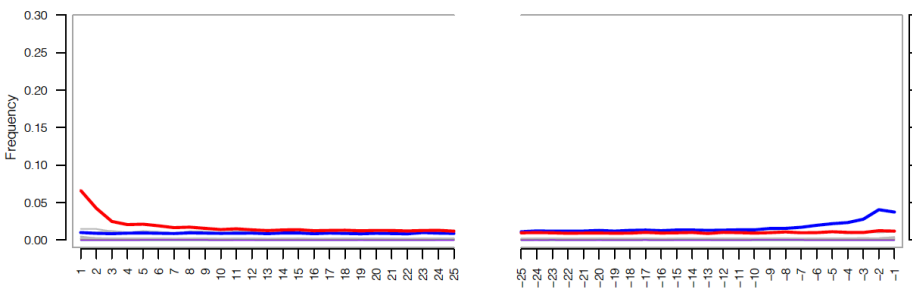

**Figure S4****ELSidron1**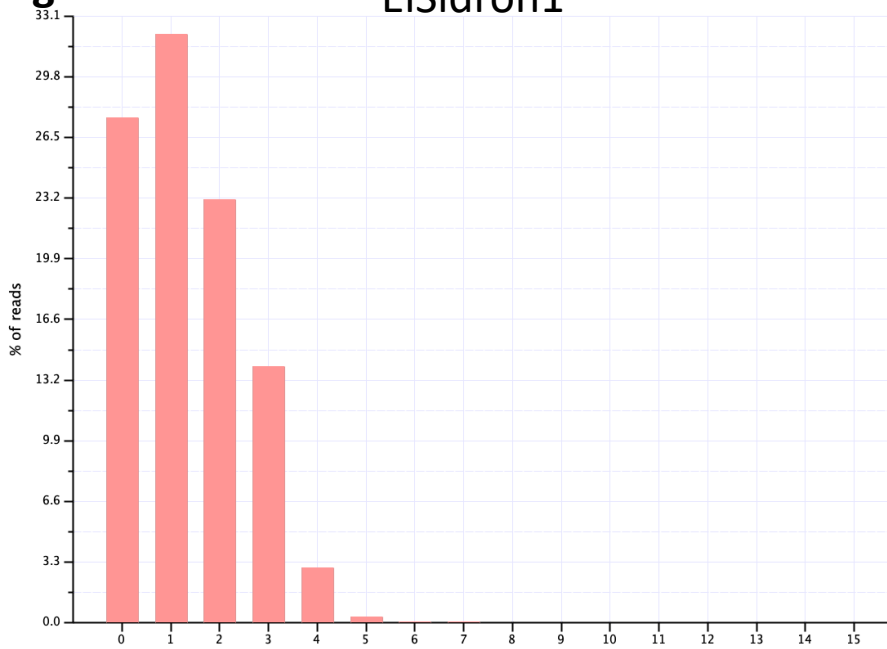**Japan Jomon 1**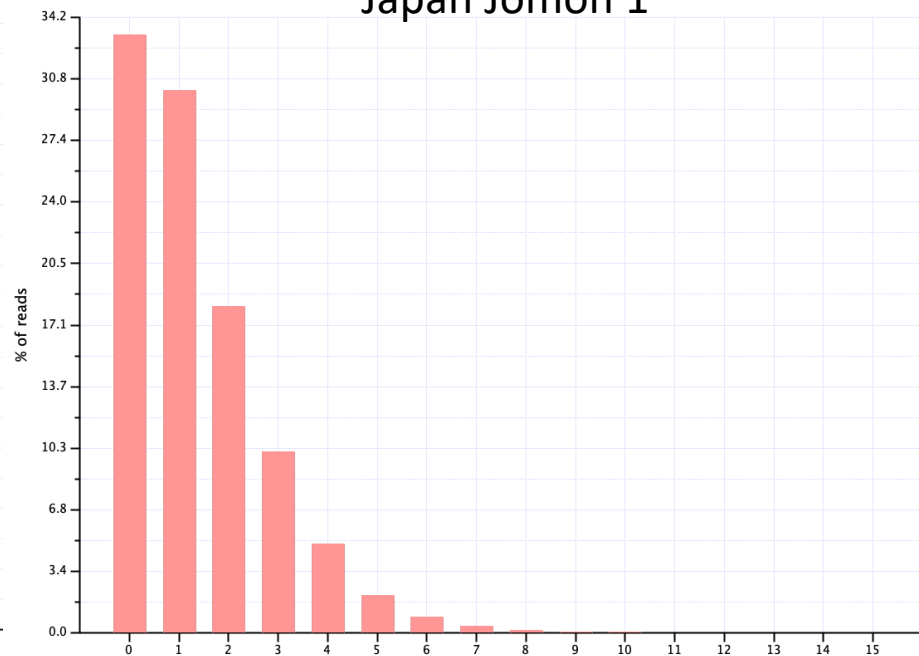**Japan Jomon 2**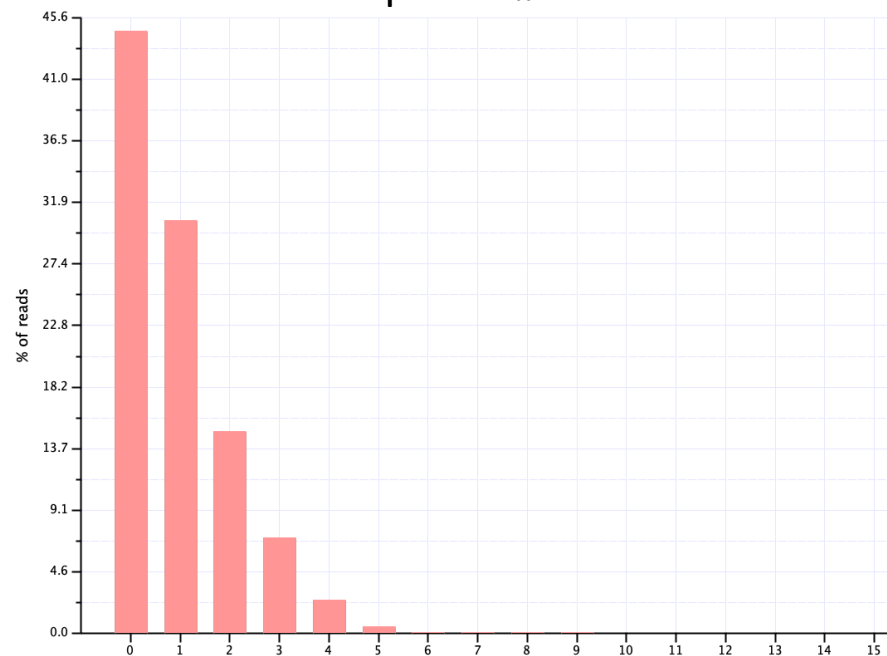**Japan Jomon 4**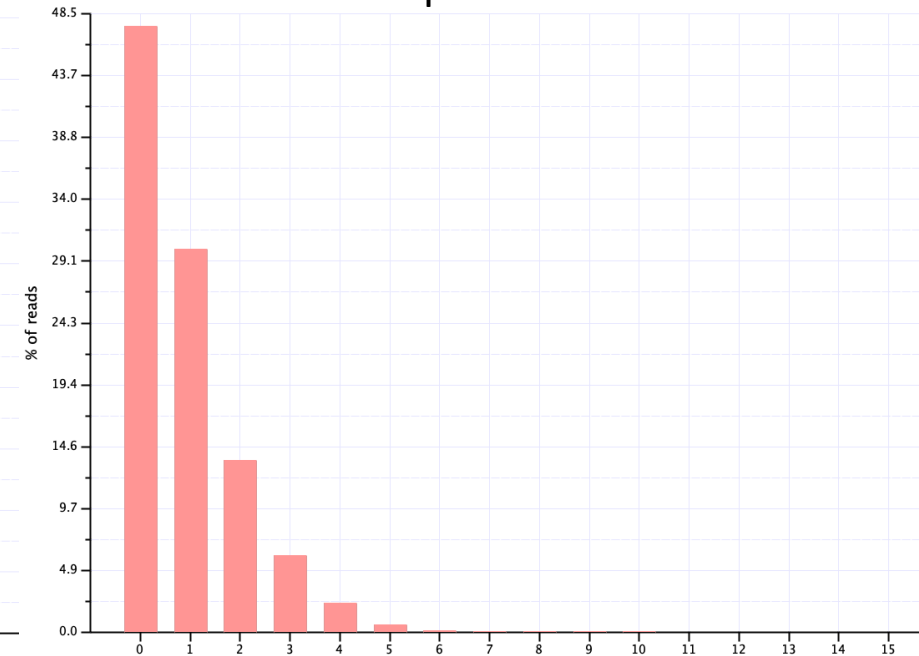

**Figure S5****Japan Edo 1**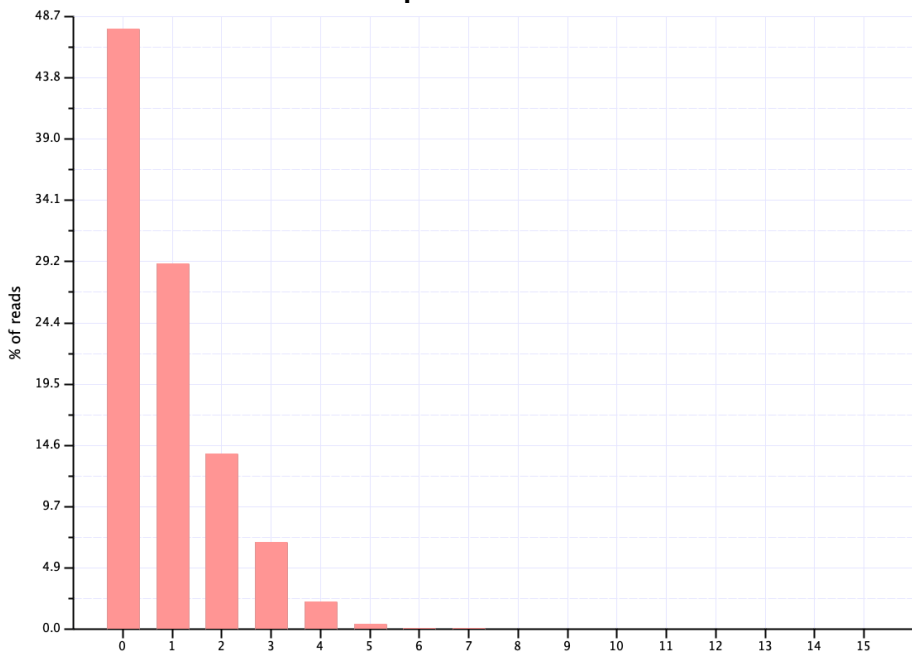**Japan Edo 2**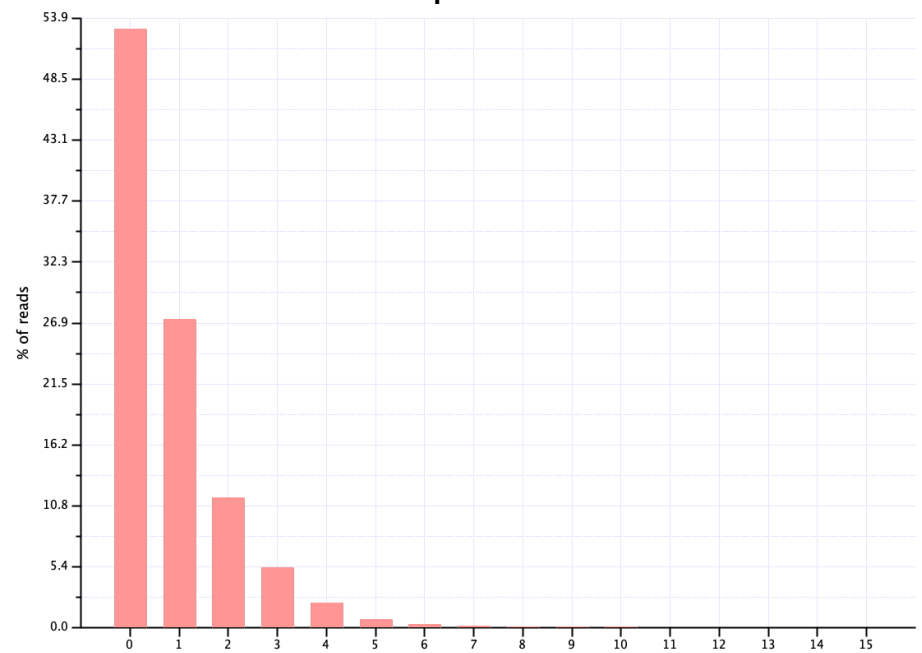**Japan Edo 4**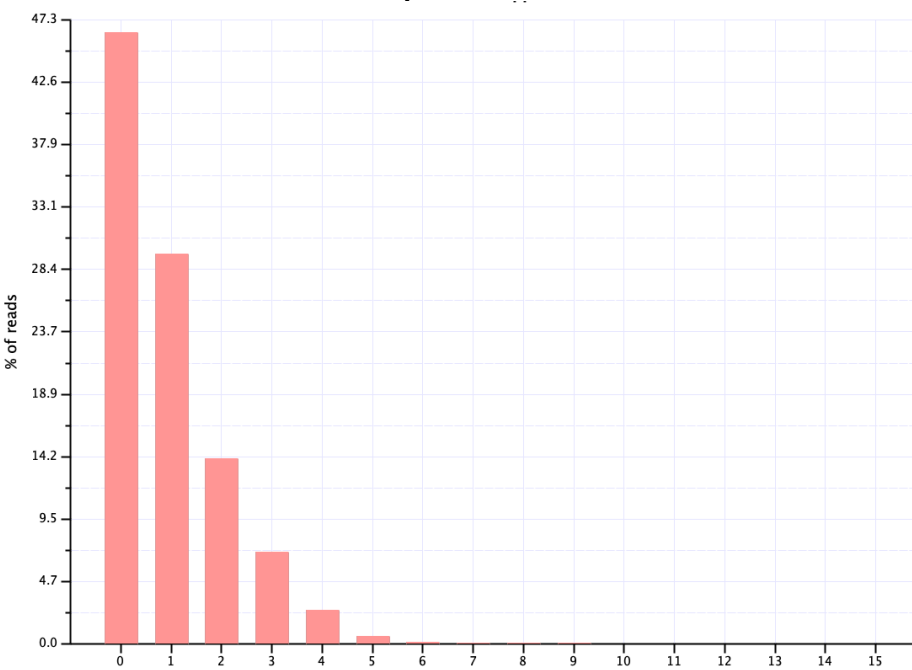**Japan Edo 5**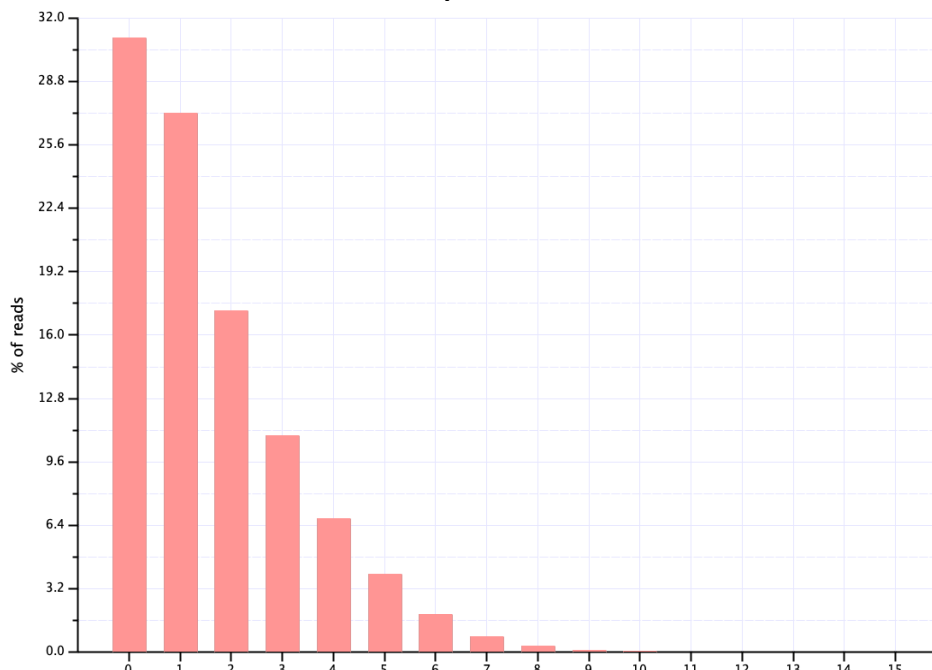

**Figure S6****Japan Edo 6**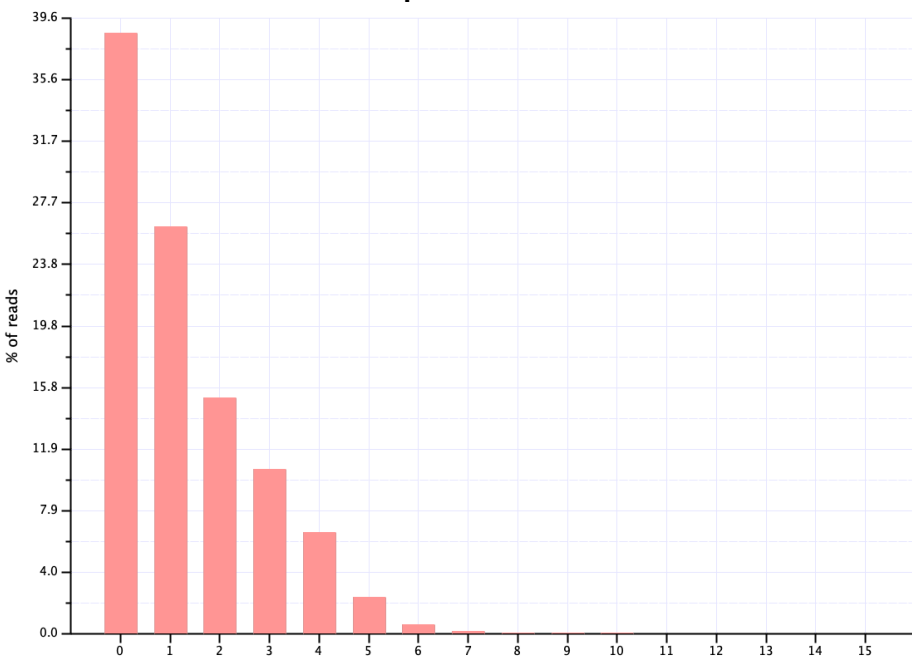**Japan Edo 7**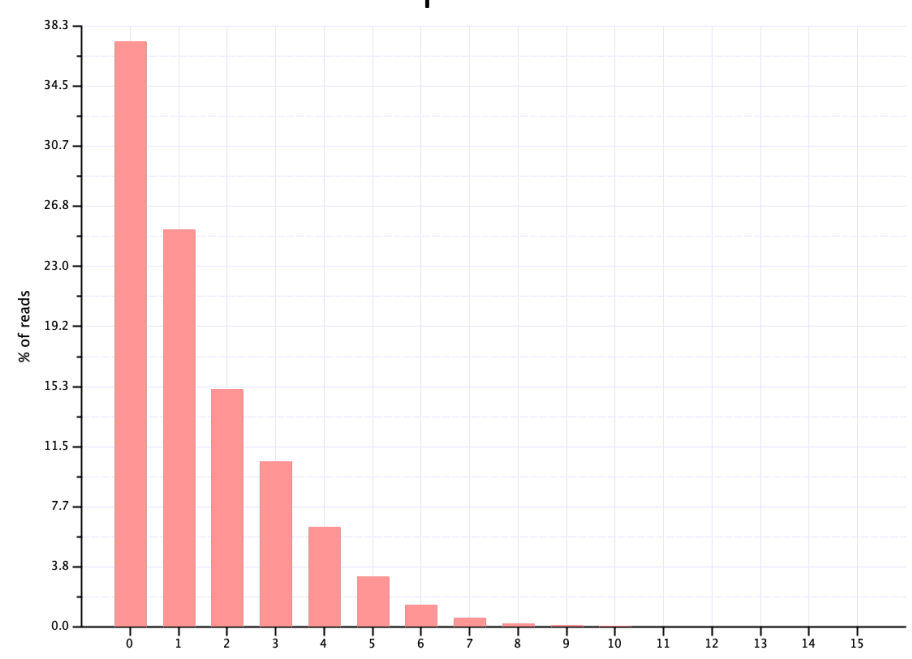**Japan Edo 8**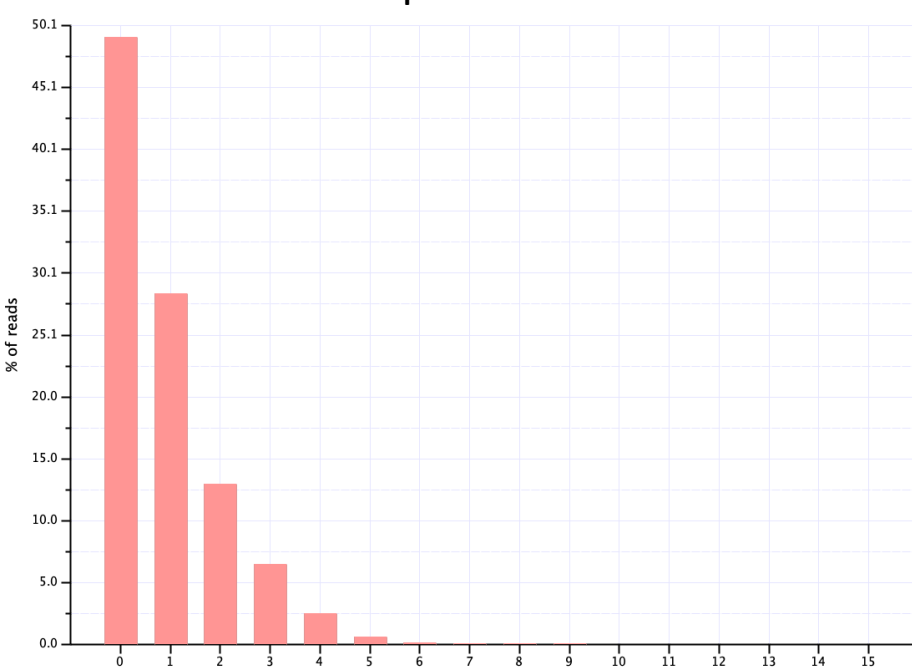**Japan Edo 9**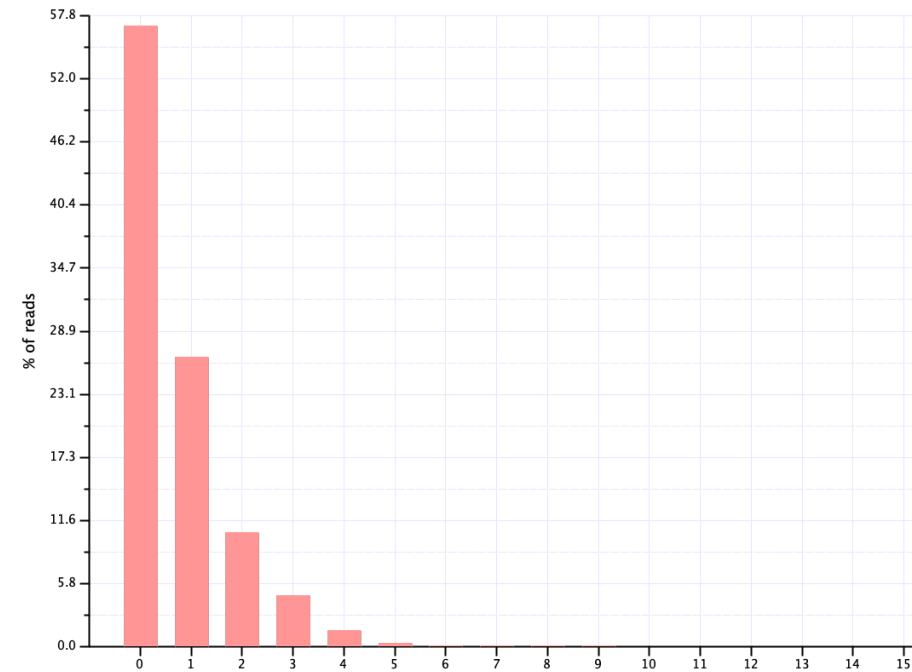

Figure S7

Japan Edo 10

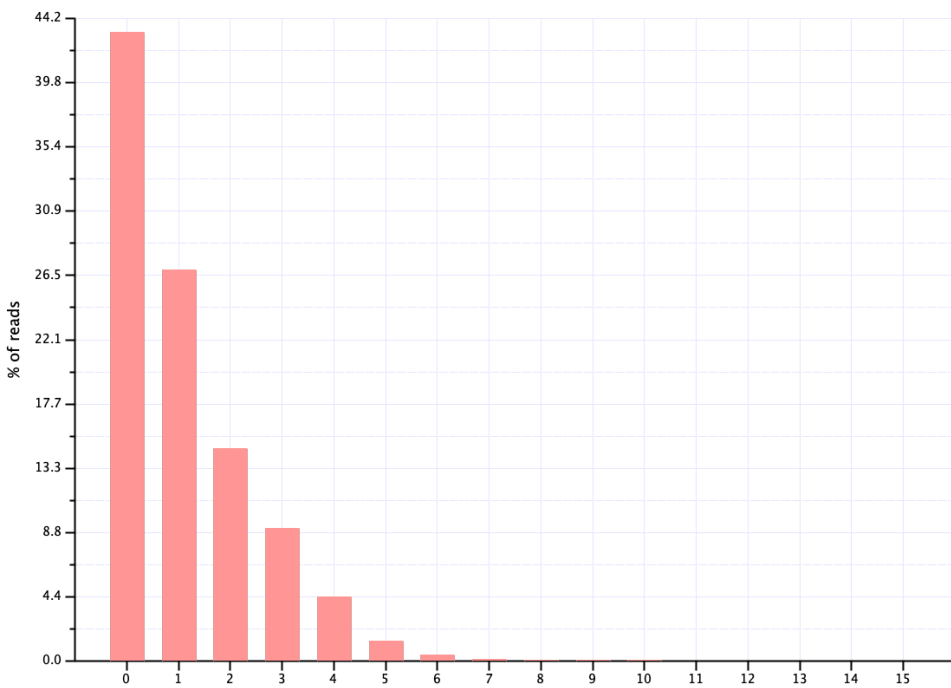



# Figure S8

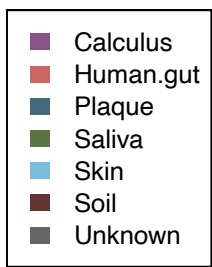

Calculus\_18015.Japan.Jomon.1

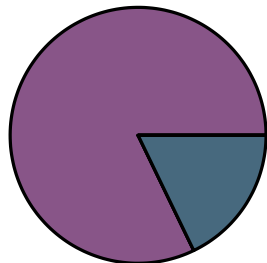

Calculus\_18016.Japan.Jomon.2

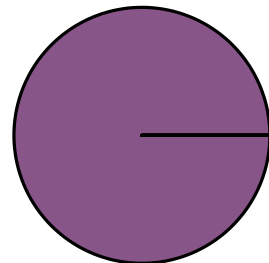

Calculus\_18017.Japan.Jomon.3

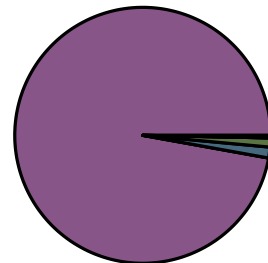

Calculus\_18018.Japan.Jomon.4

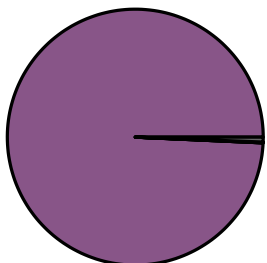

Calculus\_18020.Japan.Early.1

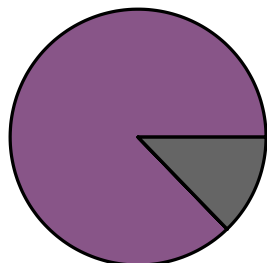

Calculus\_18021.Japan.Early.2

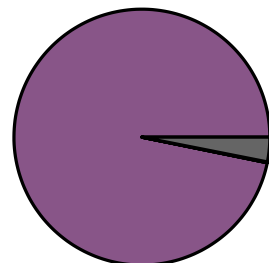

Calculus\_18022.Japan.Early.3

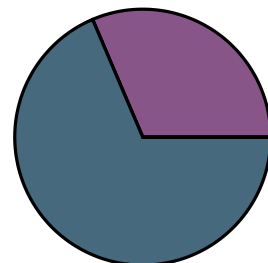

Calculus\_18023.Japan.Early.4

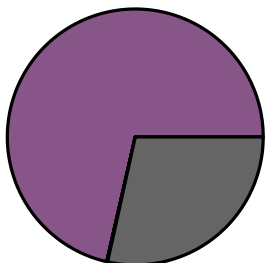

Calculus\_18024.Japan.Early.5

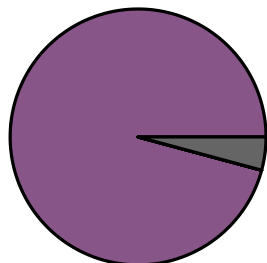

Calculus\_18025.Japan.Early.6

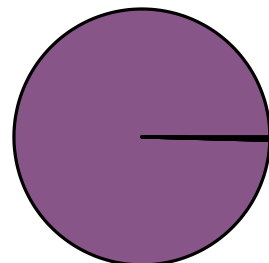

Calculus\_18026.Japan.Early.7

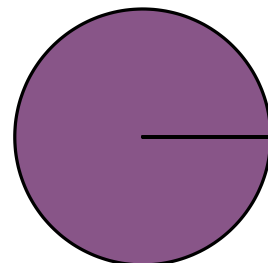

Calculus\_18027.Japan.Early.8

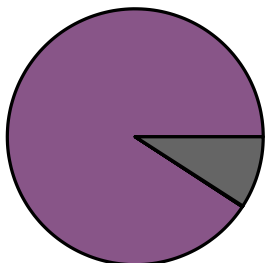

Calculus\_18032.Japan.Early.9

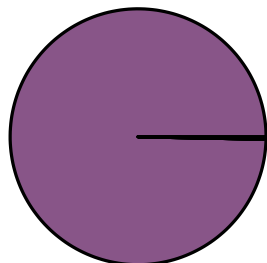

Calculus\_18033.Japan.Early.10

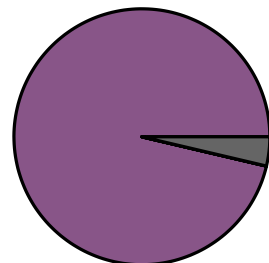

Supplement: rstb20190578supp2.pdf [file rstb20190578supp2.pdf]
